# Supplementary material for: Self -templated construction of hollow trimetallic MnNiCoP yolk–shell spheres assembled with nanosheets as a satisfactory positive electrode material for hybrid supercapacitors
Source: Royal Society of Chemistry journal article supplement (doi:10.1039/d3nr01734f), 2023-01-01
Supplement: d3nr01734f1.pdf [file d3nr01734f1.pdf]

## Supporting Information

### Self-templated construction of hollow trimetallic MnNiCoP yolk-shell spheres assembled with nanosheets as a satisfactory electrode material for hybrid supercapacitors

Majid shirvani, Saied Saeed Hosseiny Davarani\*

Department of Chemistry, Shahid Beheshti University, G. C., 1983963113, Evin,  
Tehran, Iran. E-mail: ss-hosseiny@sbu.ac.ir; Fax: +98 21 22431661;  
Tel: +98 21 22431661

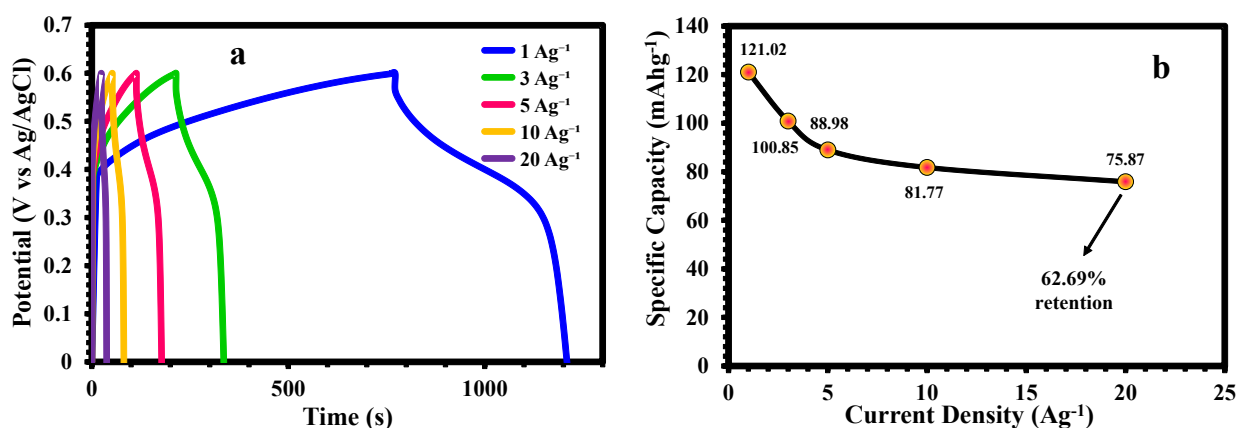

Fig. S1 (a) GCD profiles of the MnNiCo-LDH@NiF electrode at different current densities (b) Rate performance of the MnNiCo-LDH@NiF electrode.

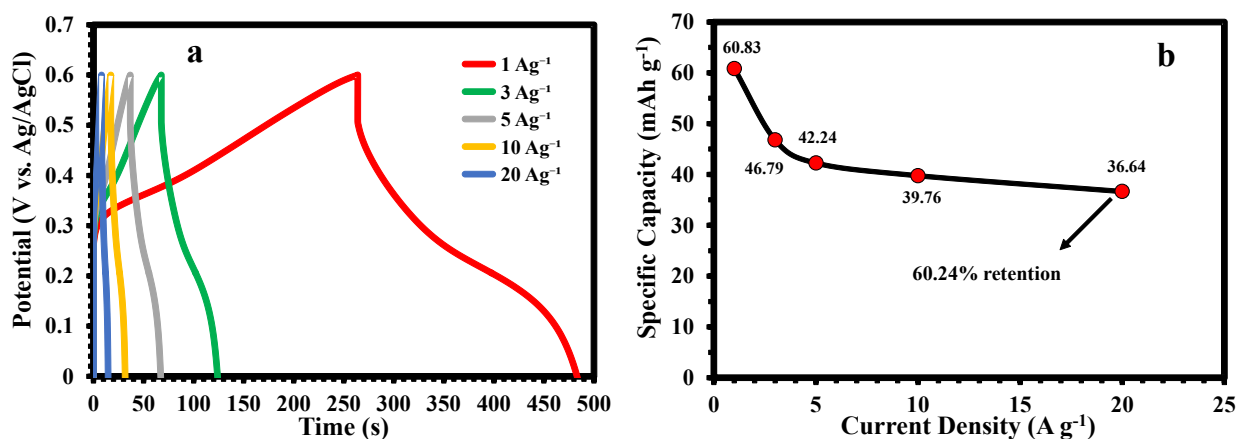

Fig. S2 (a) GCD profiles of the NiCo-gly@NiF electrode at different current densities (b) Rate performance of the NiCo-gly@NiF electrode.

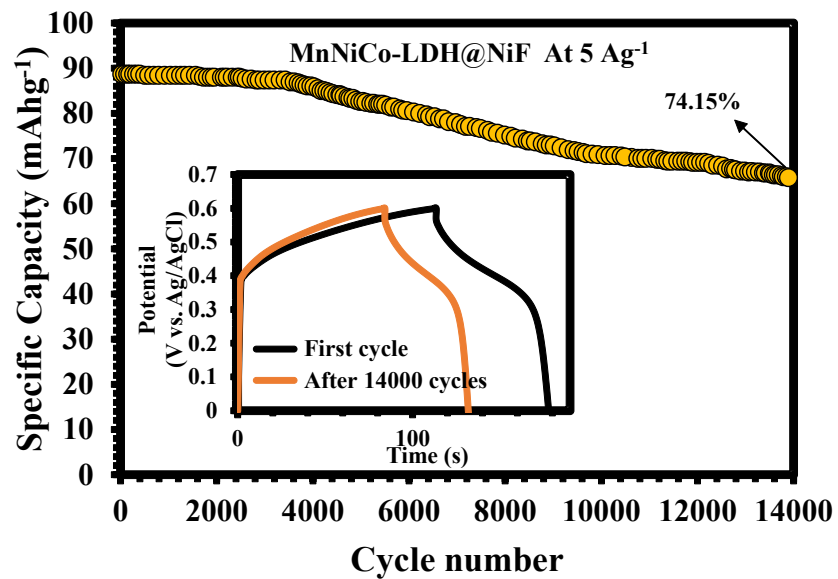

Fig. S3 Durability of the MnNiCo-LDH@NiF electrode at 5 Ag<sup>-1</sup>.

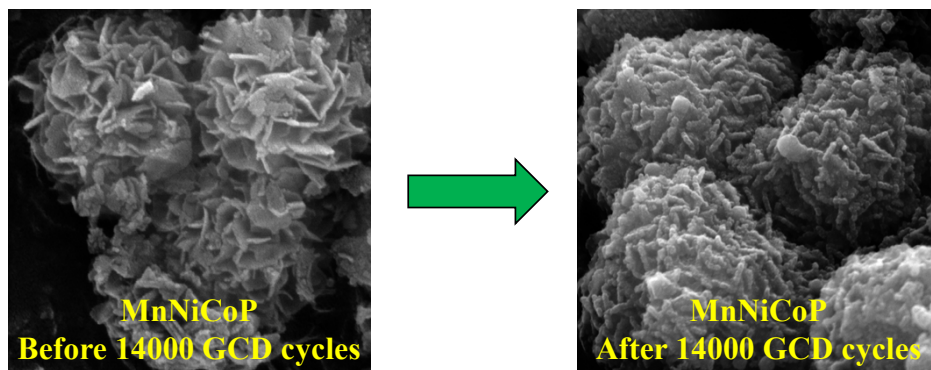

Fig. S4 FE-SEM images of the MnNiCoP electrode material after 14,000 GCD cycles.

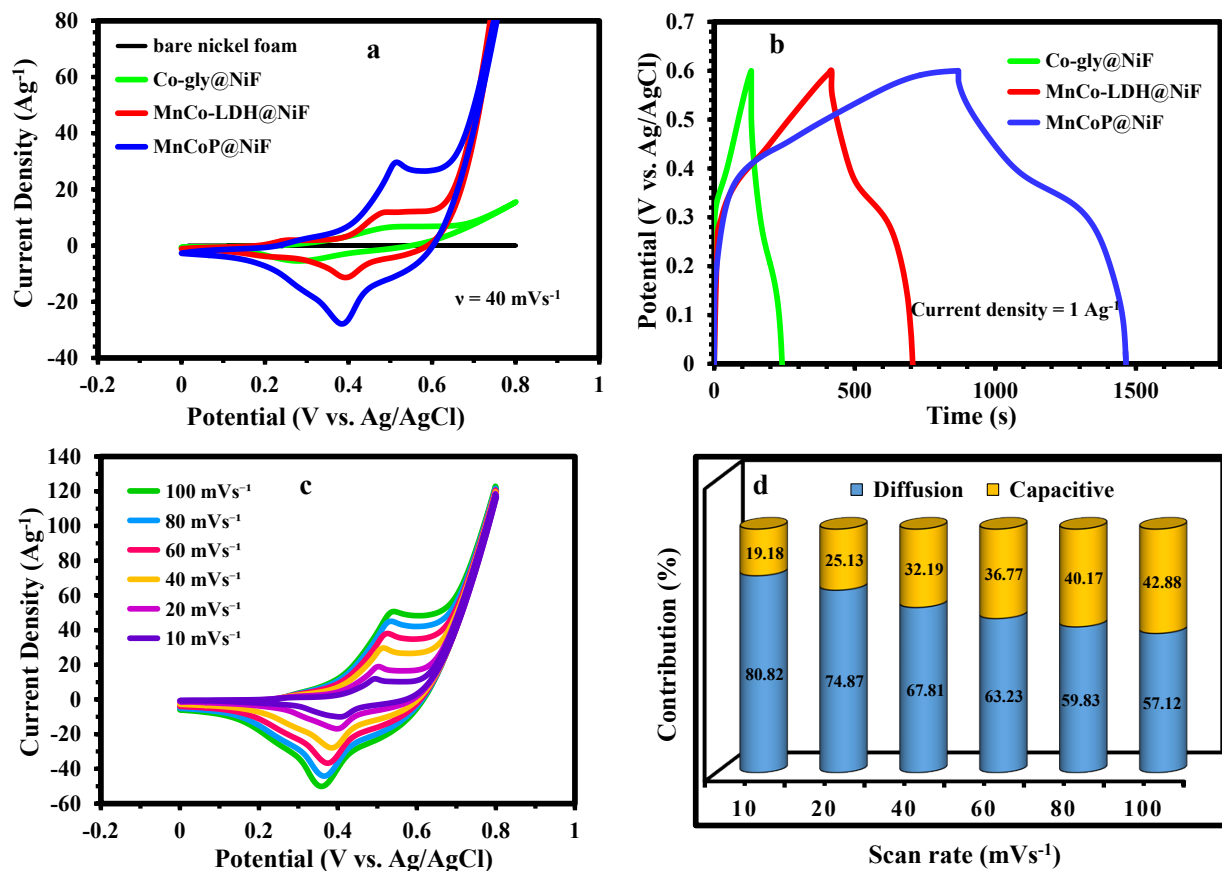

**Fig. S5** (a) CVs of the bare nickel foam, Co-gly@NiF, MnCo-LDH@NiF, and MnCoP@NiF electrodes at 40 mVs<sup>-1</sup> (b) Charge-discharge curves of the Co-gly@NiF, MnCo-LDH@NiF, and MnCoP@NiF electrodes at 1 Ag<sup>-1</sup> (c) CVs of the MnCoP@NiF electrode from 10 to 100 mVs<sup>-1</sup> (d) The relative contribution of the capacitive and diffusion-controlled charge storage in the prepared MnCoP@NiF electrode at different scan rates

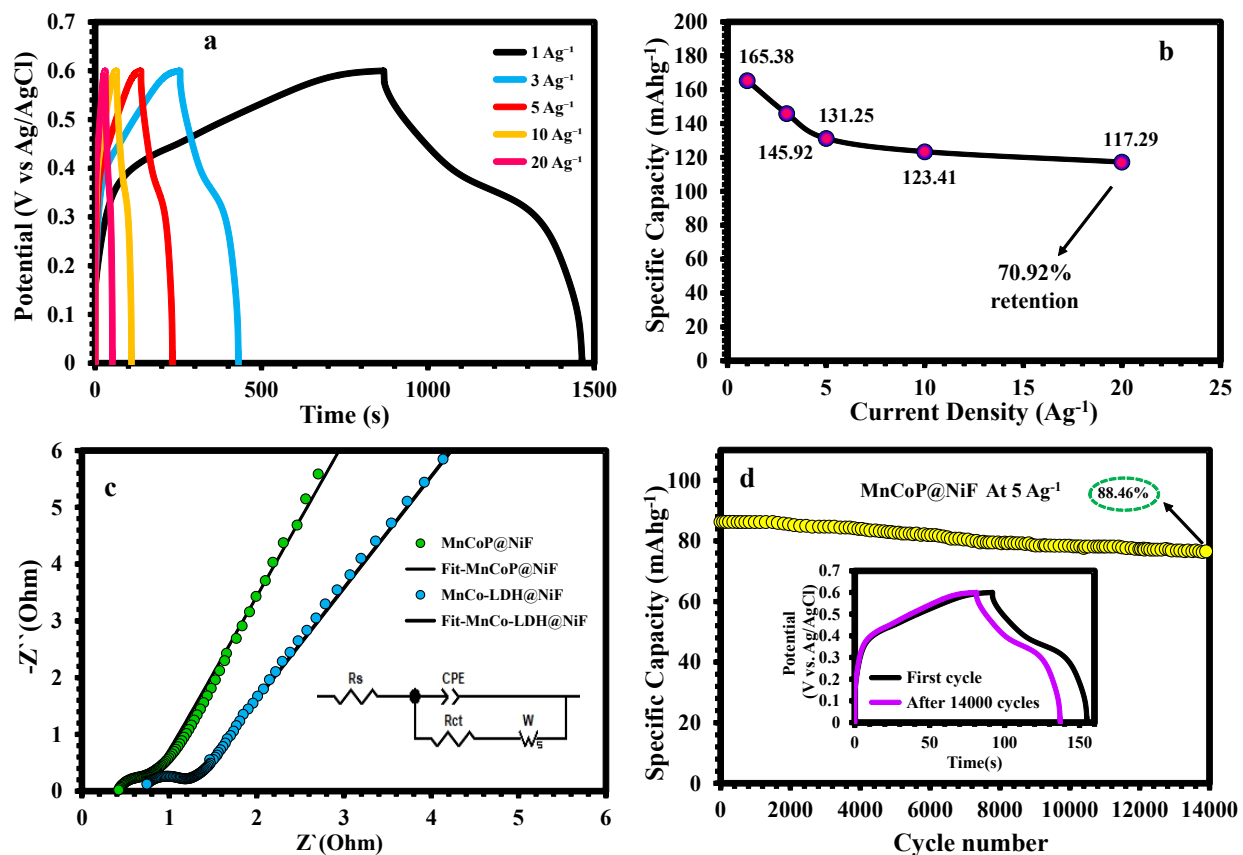

**Fig. S6** (a) GCD profiles of the MnCoP@NiF electrode at different current densities (b) Rate performance of the MnCoP@NiF electrode (c) Nyquist plots of the MnCoP@NiF and MnCo-LDH@NiF electrodes (in the frequency range of 100 kHz to 1 Hz; equivalent circuit in inset) (d) Durability of the MnCoP@NiF electrode at 5  $\text{Ag}^{-1}$ .

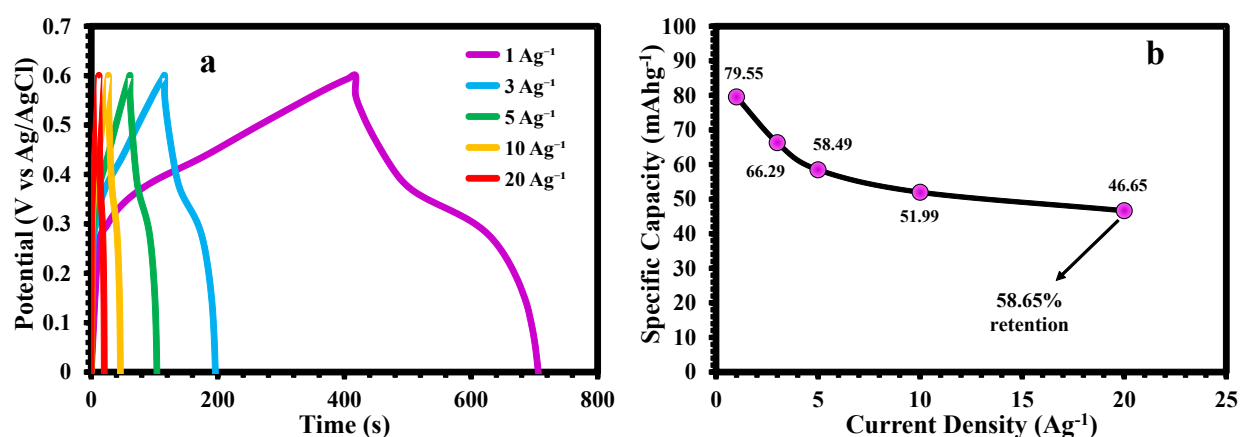

**Fig. S7** (a) GCD profiles of the MnCo-LDH@NiF electrode at different current densities (b) Rate performance of the MnCo-LDH@NiF electrode.

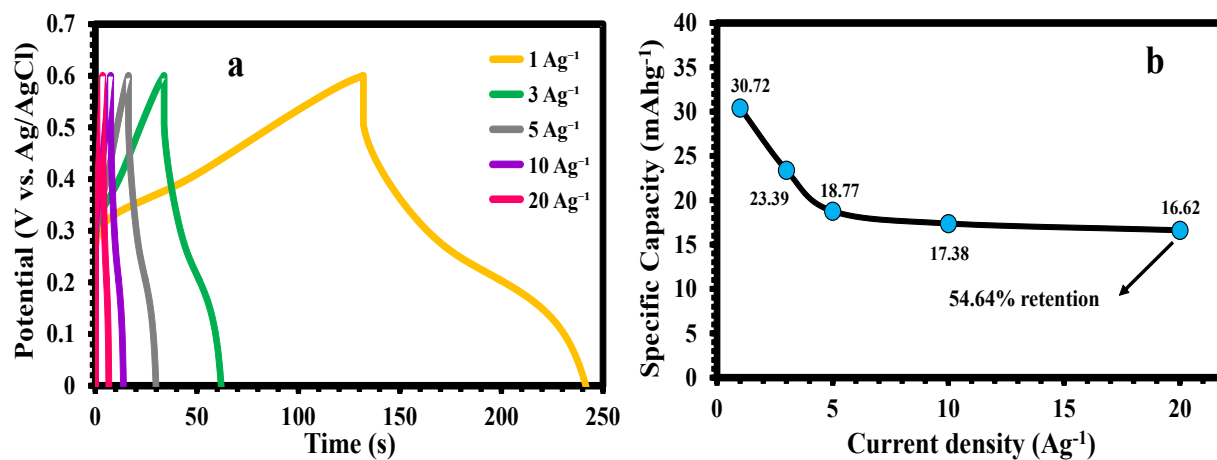

**Fig. S8** (a) GCD profiles of the Co-gly@NiF electrode at different current densities (b) Rate performance of the Co-gly@NiF electrode.

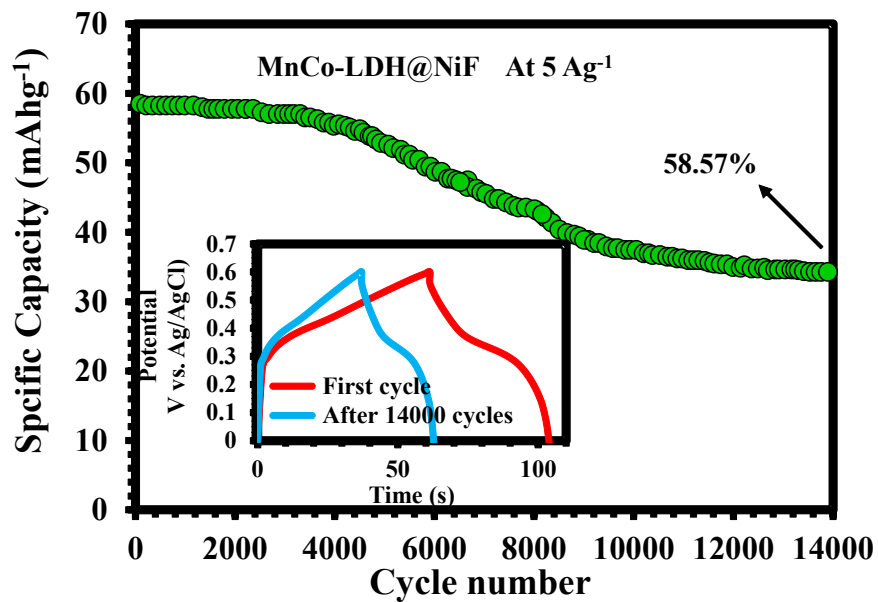

**Fig. S9** Durability of the MnCo-LDH@NiF electrode at 5 Ag<sup>-1</sup>.

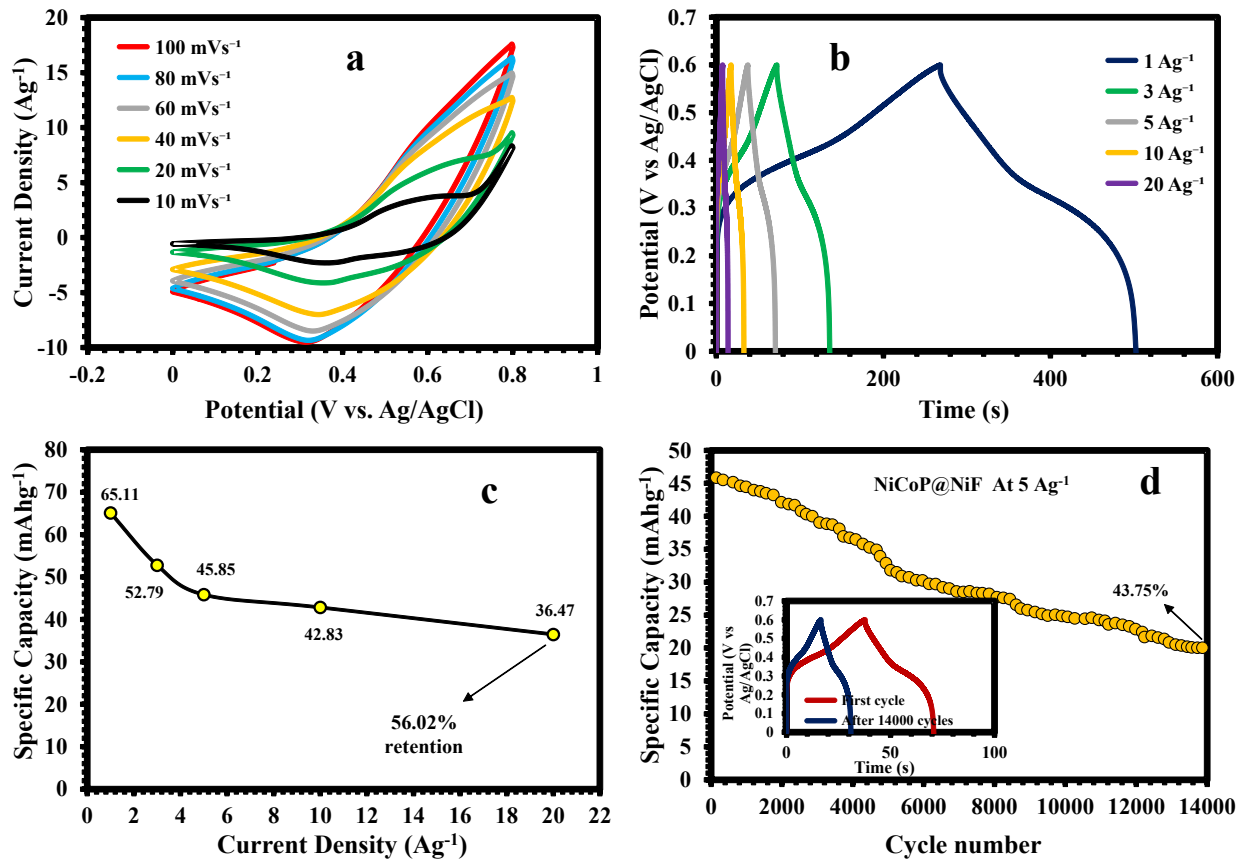

**Fig. S10** (a) CVs of the NiCoP@NiF electrode at various scan rate of 10-100  $\text{mVs}^{-1}$  (b) GCD curves of the NiCoP@NiF electrode at various current densities of 1-20  $\text{Ag}^{-1}$  (c) Specific capacity vs. current density of the NiCoP@NiF electrode. (d) Durability of the NiCoP@NiF electrode at 5  $\text{Ag}^{-1}$ .

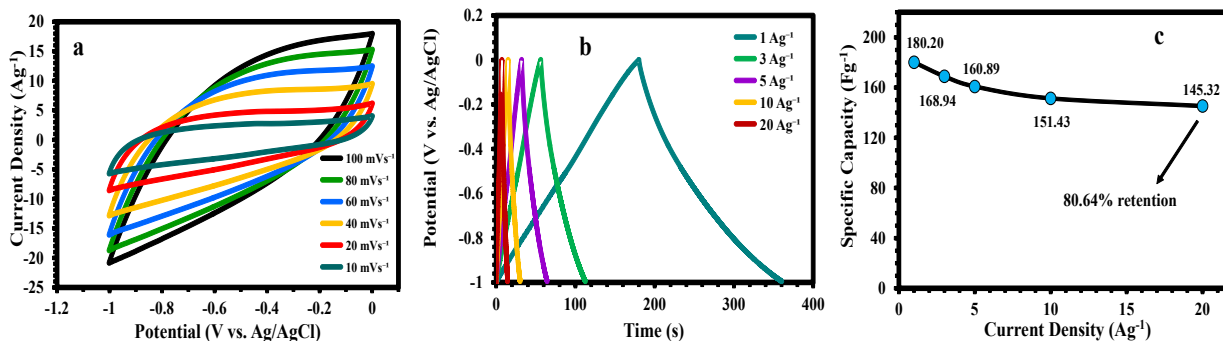

**Fig. S11** (a) CVs of the AC-based electrode at various scan rate of 10-100  $\text{mVs}^{-1}$  (b) GCD curves of the AC-based electrode at various current densities of 1-20  $\text{Ag}^{-1}$  (c) Specific capacitance vs. current density of AC-based electrode.

**Table S1** Comparison of the performance of the MnNiCoP electrode material with other previously reported materials

| Composition                           | Capacity(mAhg <sup>-1</sup> ) | Cycles, retention    | Rate capability                  | ED(Wkg <sup>-1</sup> ) | Reference        |
|---------------------------------------|-------------------------------|----------------------|----------------------------------|------------------------|------------------|
| Ni <sub>2</sub> P/NiCoP               | 205.92                        | 3000, 89.2%          | 75.5% at 20 Ag <sup>-1</sup>     | 44.5                   | 1                |
| O-CoxNiyP                             | 199.19                        | 5000, 95.1%          | 66.7% at 20 Ag <sup>-1</sup>     | 47.5                   | 2                |
| Cu-Co-P                               | 110.6                         | 10000, 89%           | 83.1% at 10 Ag <sup>-1</sup>     | 41.3                   | 3                |
| NiCoP/NC                              | 172.18                        | 8000, 75.5%          | 77.4% at 16 Ag <sup>-1</sup>     | 52.5                   | 4                |
| NiCoP                                 | 182.91                        | 5000, 80.7%          | 66% at 30 Ag <sup>-1</sup>       | 41.3                   | 5                |
| Ni <sub>0.4</sub> Mn <sub>1.6</sub> P | 176.66                        | 2000, 75%            | -                                | 21.1                   | 6                |
| Ni-Co-P-3                             | 213.1                         | 5000, 85%            | 86% at 20 Ag <sup>-1</sup>       | 48.4                   | 7                |
| <b>MnNiCoP</b>                        | <b>291.24</b>                 | <b>14000, 91.30%</b> | <b>80% at 20 Ag<sup>-1</sup></b> | <b>57.03</b>           | <b>This work</b> |

## References

- 1 Z. Li, K. Ma, F. Guo, C. Ji, H. Mi, P. Qiu and H. Pang, *Mater. Lett.*, 2021, **288**, 129319.
- 2 S. Jiang, M. Pang, R. Liu, J. Song, R. Wang, N. Li, Q. Pan, H. Yang, W. He and J. Zhao, *J. Alloys Compd.*, 2022, **895**, 162451.
- 3 Y. Zhu, P. Lu, F. Li, Y. Ding and Y. Chen, *ACS Appl. Energy Mater.*, 2021, **4**, 3962-3974.
- 4 T. Zhao, C. Liu, F. Yi, X. Liu, A. Gao, D. Shu and J. Ling, *Appl. Surf. Sci.*, 2021, **569**, 151098.
- 5 P. Li, M. Zhang, H. Yin, J. Yao, X. Liu and S. Chen, *Appl. Surf. Sci.*, 2021, **536**, 147751.
- 6 Y. Wang, L. Chen, S. Lin, G. Wu, J. Luo, H. Yang and H. Qin, *Mater. Today Commun.*, 2021, **26**, 102057.
- 7 G. Qu, P. Sun, G. Xiang, J. Yin, Q. Wei, C. Wang and X. Xu, *Appl. Mater. Today*, 2020, **20**, 100713.
